# Supplementary material for: Mapping the Fitness Landscape of Gene Expression Uncovers the Cause of Antagonism and Sign Epistasis between Adaptive Mutations
Source: PLoS Genet. 2014 Feb 27;10(2):e1004149. doi: 10.1371/journal.pgen.1004149 (PMC3937219; doi:10.1371/journal.pgen.1004149)
Supplement: Table S3 — The value of fitted parameters in the fitness landscape model. (DOCX) [file pgen.1004149.s006.docx]

**Table S3. The value of fitted parameters in the fitness landscape model.**

| **Parameter** | **Value** |
| --- | --- |
| *V*max | 175.841 |
| E*h* | 0.186 |
| Threshold | 173.230 |
| *C*1 | 0.011 |
| *C*2 | 0.002 |
